# Supplementary material for: Mitochondrial dynamics in the rat dorsal raphe nucleus underlie sleep pressure and sleep structure regulation
Source: Research Square preprint supplement (doi:10.21203/rs.3.rs-2493747/v1), 2023-01-19
Supplement: Supplementary file 1 [file d08fe093c961326bb5397114.docx]

**
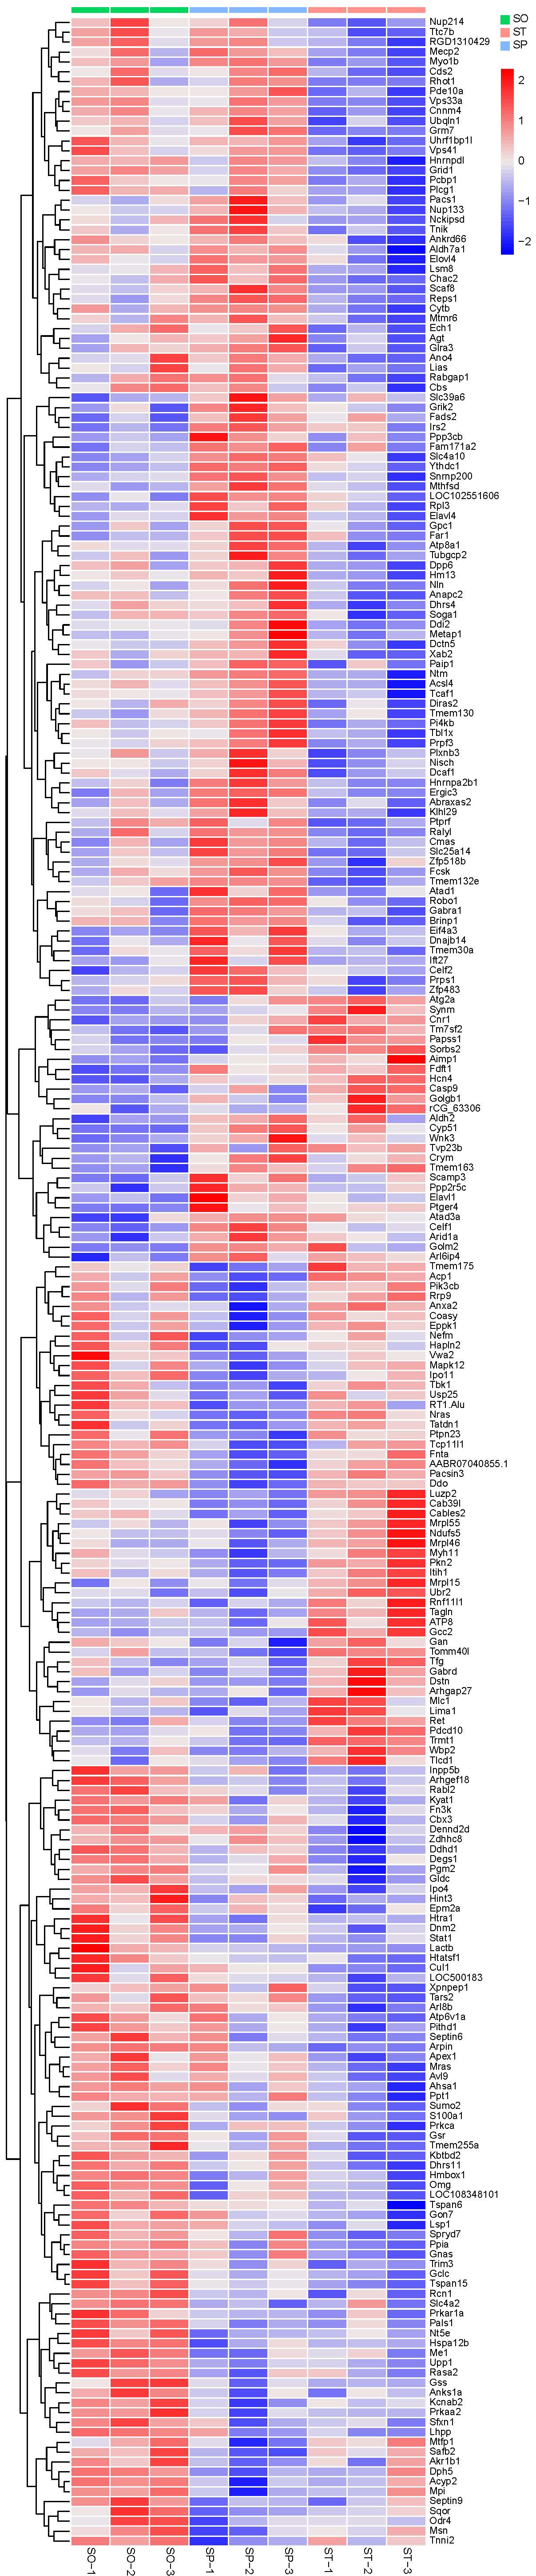
**

**Extended Data Fig. 1. Heat map of cluster analysis of differentially expressed proteins.**


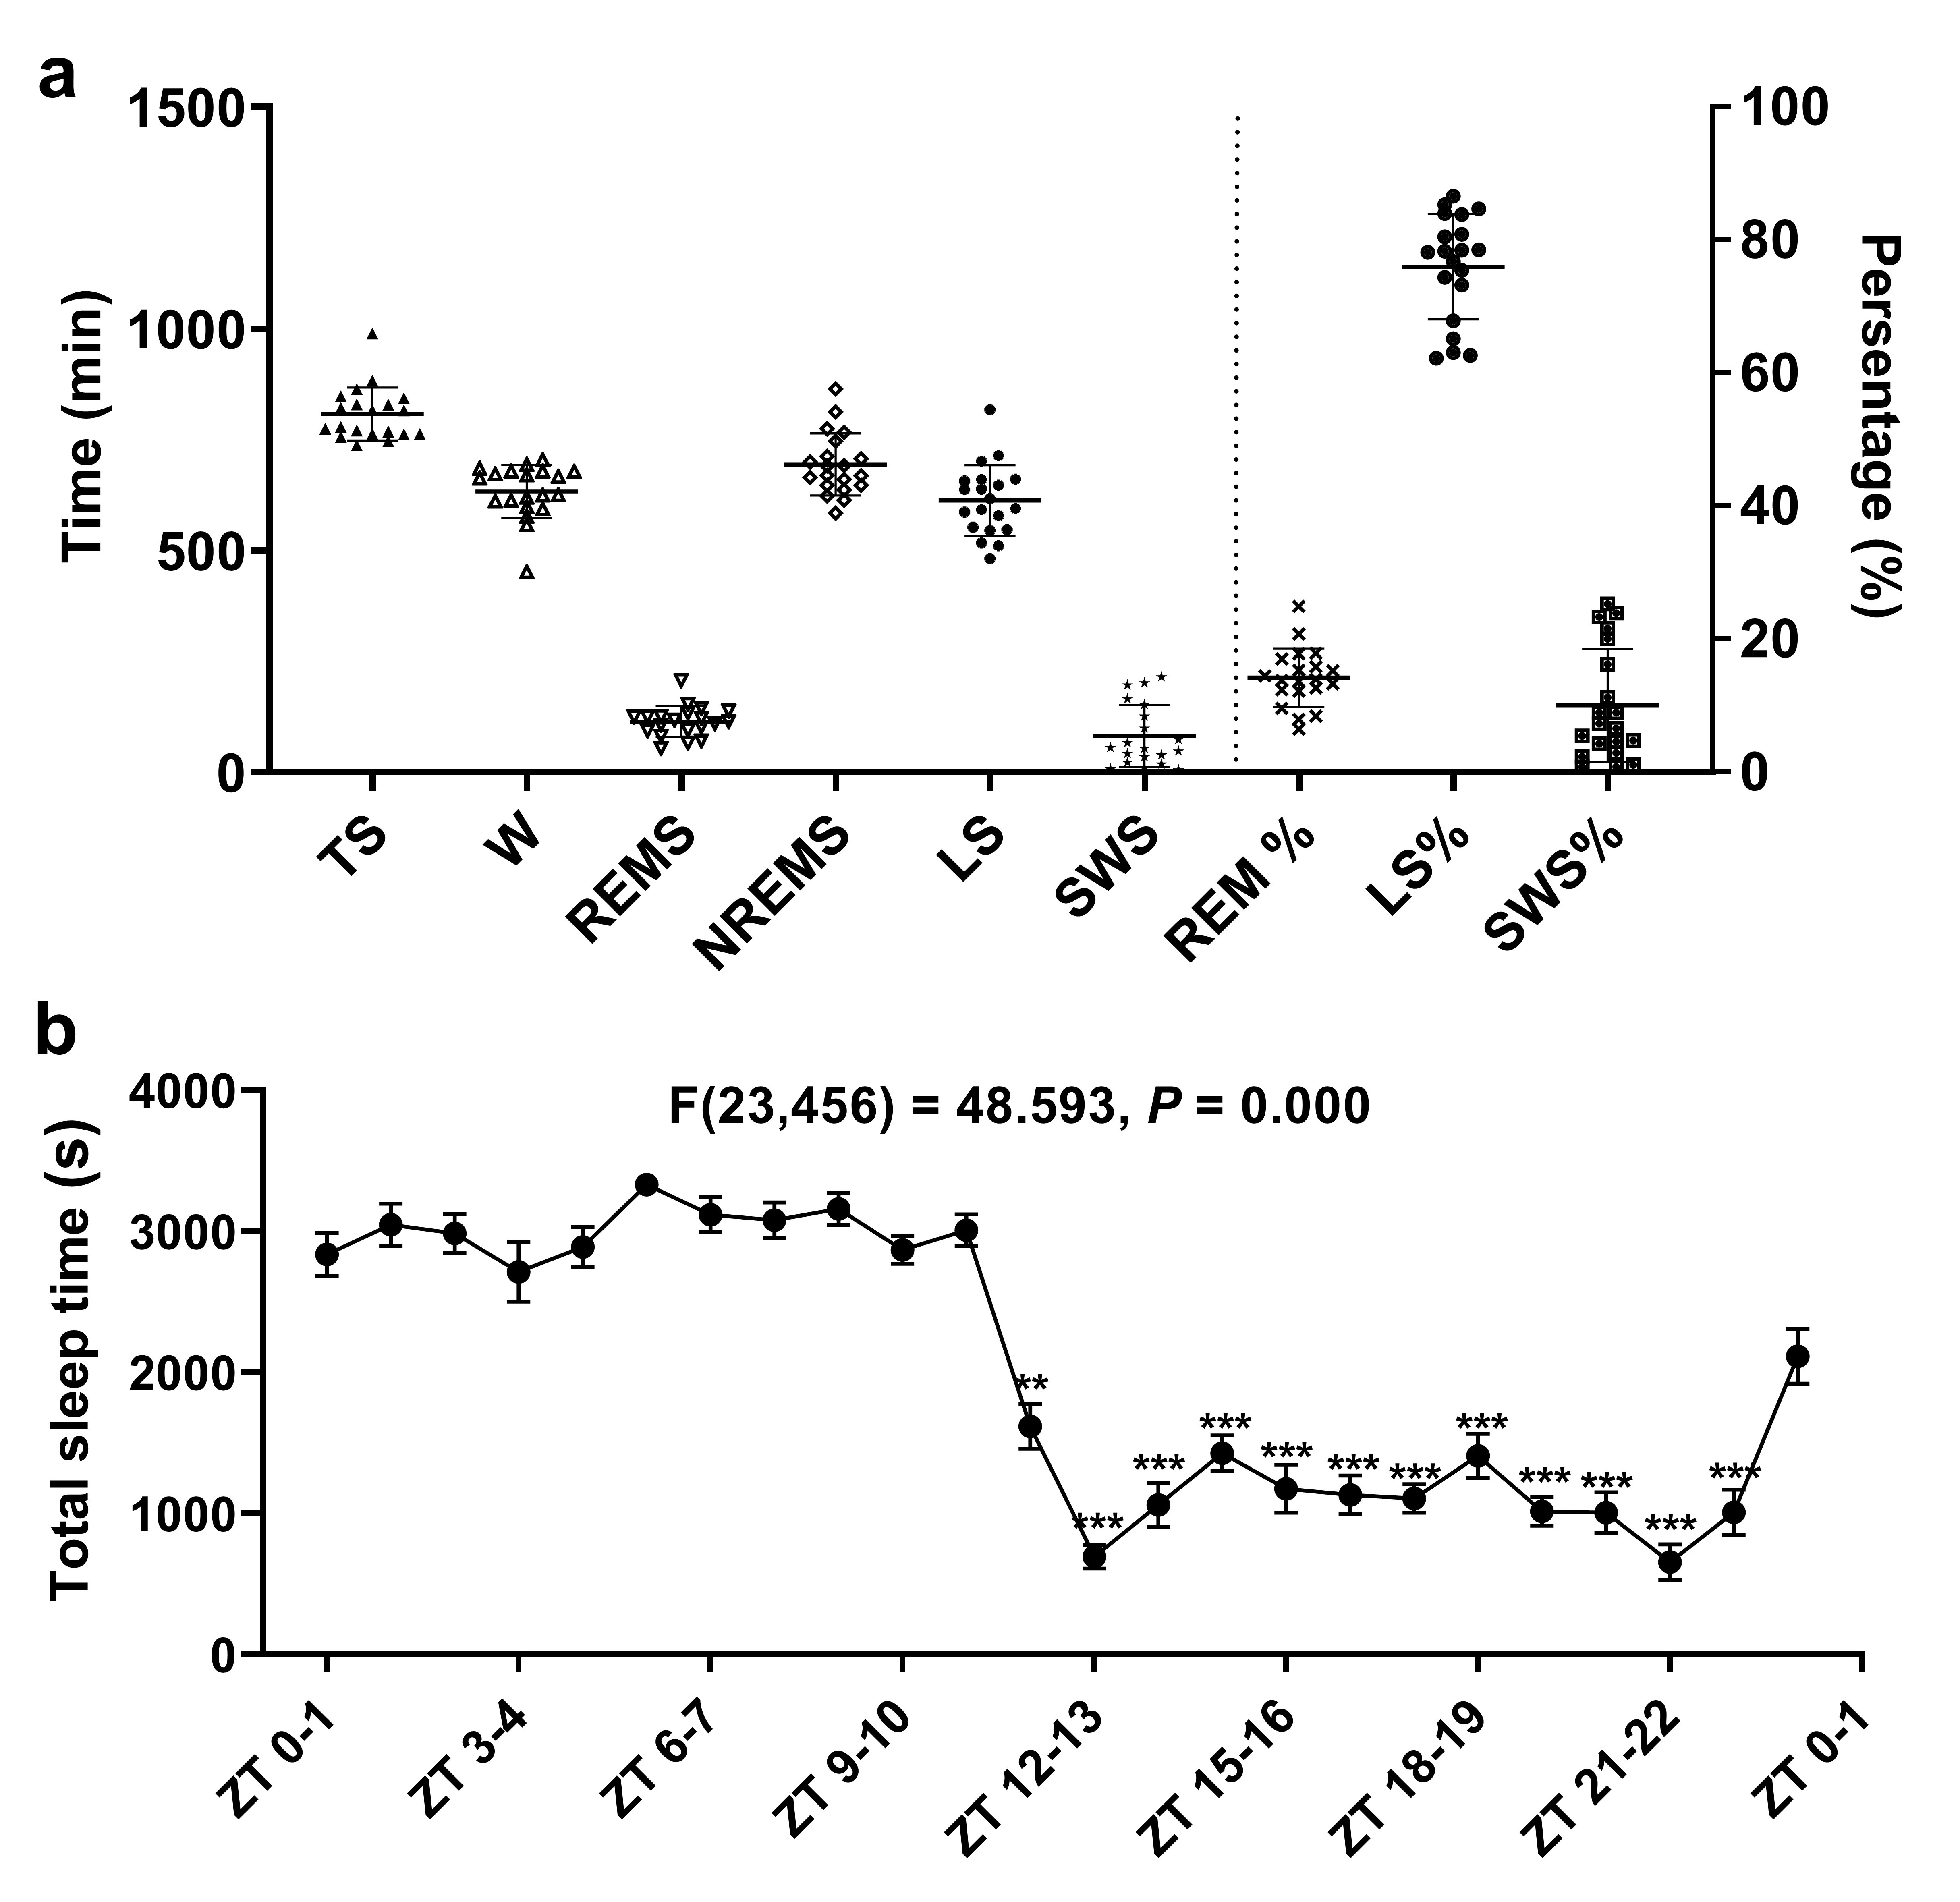


**Extended Data Fig. 2. 24-h sleep structural analysis of rats.**

**a.** Time spent in total sleep (TS), wakefulness (W), rapid eye movement sleep (REMS), non-rapid eye movement sleep (NREMS), light sleep (LS), slow-wave sleep (SWS), percentage of REMS relative to TS (REMS%), percentage of LS relative to TS (LS%), and percentage of SWS relative to TS (SWS%). **b.** Time spent in TS per hour. *n* = 20/group. The data are expressed as the mean ± SEM. Data were compared using one-way ANOVA followed by Tamhane *post hoc* test. Values of P < 0.05 were considered statistically significant. ***P* < 0.01, *** *P* < 0.001, *vs*. ZT 0 group.

**Supplementary information**

Table 1. Marker channels in TMT labeling.

| **Group** | **Sample** | **Channel** |
| --- | --- | --- |
| ZT0 | ZT0-1 | 126C |
| ZT0 | ZT0-2 | 127N |
| ZT0 | ZT0-3 | 127C |
| ZT6 | ZT6-1 | 128N |
| ZT6 | ZT6-2 | 128C |
| ZT6 | ZT6-3 | 129N |
| ZT12 | ZT12-1 | 129C |
| ZT12 | ZT12-2 | 130N |
| ZT12 | ZT12-3 | 130C |
| ZT18 | ZT18-1 | 131N |
| ZT18 | ZT18-2 | 131C |
| ZT18 | ZT18-3 | 132N |

Table 2. Primary and secondary antibodies used in western blot analysis and immunohistochemistry.

|  | **Protein** | | **Product** | **Dilution** |
| --- | --- | --- | --- | --- |
| **1.** | | Drp1 | Cell Signaling Technology, DRP1 (D8H5) Rabbit mAb #5391 | 1:1000 |
| **2.** | | Fis1 | Sigma‒Aldrich, Anti-FIS1 antibody produced in rabbit # HPA017430 | 1:1000 |
| **3.** | | OPA1 | Cell Signaling Technology, OPA1 (D6U6N) Rabbit mAb #80471 | 1:1000 |
| **4.** | | Mfn1 | Abcam, Anti-Mitofusin 1 antibody [11E91H12] Mouse mAb: #ab126575 | 1:1000 |
| **5.** | | Mfn2 | Cell Signaling Technology, Mitofusin-2 (D2D10) Rabbit mAb #9482 | 1:1000 |
| **6.** | | β-actin | ABclonal, ACTB Mouse mAb # AC004 | 1:100000 |
| **7.** | | HRP-conjugated secondary antibody | ABclonal, HRP Goat Anti-Rabbit IgG (H+L) #AS014 | 1:2000 |
| **8.** | | HRP-conjugated secondary antibody | ABclonal, HRP Goat Anti-Mouse IgG (H+L) #AS003 | 1:2000 |
| **9.** | | TPH2 | Cell Signaling Technology, TPH2 [D3E5I] Rabbit mAb #51124 | 1:1000 |
| **10.** | | c-Fos | Abcam, anti-c-Fos antibody [2H2] Mouse mAb: #ab208942 | 1:500 |
| **11.** | | Fluorophore-conjugated secondary antibody | ABclonal, 488-conjugated AffiniPure Goat Anti-Rabbit IgG (H+L) #AS073 | 1:200 |
| **12.** | | Fluorophore-conjugated secondary antibody | ABclonal, 594-conjugated Goat Anti-Mouse IgG (H+L) #AS054 | 1:200 |
